# Supplementary material for: Top2a promotes the development of social behavior via PRC2 and H3K27me3
Source: PubMed Central journal article supplement (PMC9683714; doi:10.1126/sciadv.abm7069), 2022-11-23
Supplement: sciadv.abm7069_sm.pdf [file sciadv.abm7069_sm.pdf]

Supplementary Materials for  
**Top2a promotes the development of social behavior via PRC2 and H3K27me3**

Yijie Geng *et al.*

Corresponding author: Randall T. Peterson, [randall.peterson@pharm.utah.edu](mailto:randall.peterson@pharm.utah.edu)

*Sci. Adv.* **8**, eabm7069 (2022)  
DOI: 10.1126/sciadv.abm7069

**The PDF file includes:**

Figs. S1 to S14  
Tables S1 to S3  
Legend for table S4  
Legend for movie S1  
Legend for data S1

**Other Supplementary Material for this manuscript includes the following:**

Table S4  
Movie S1  
Data S1

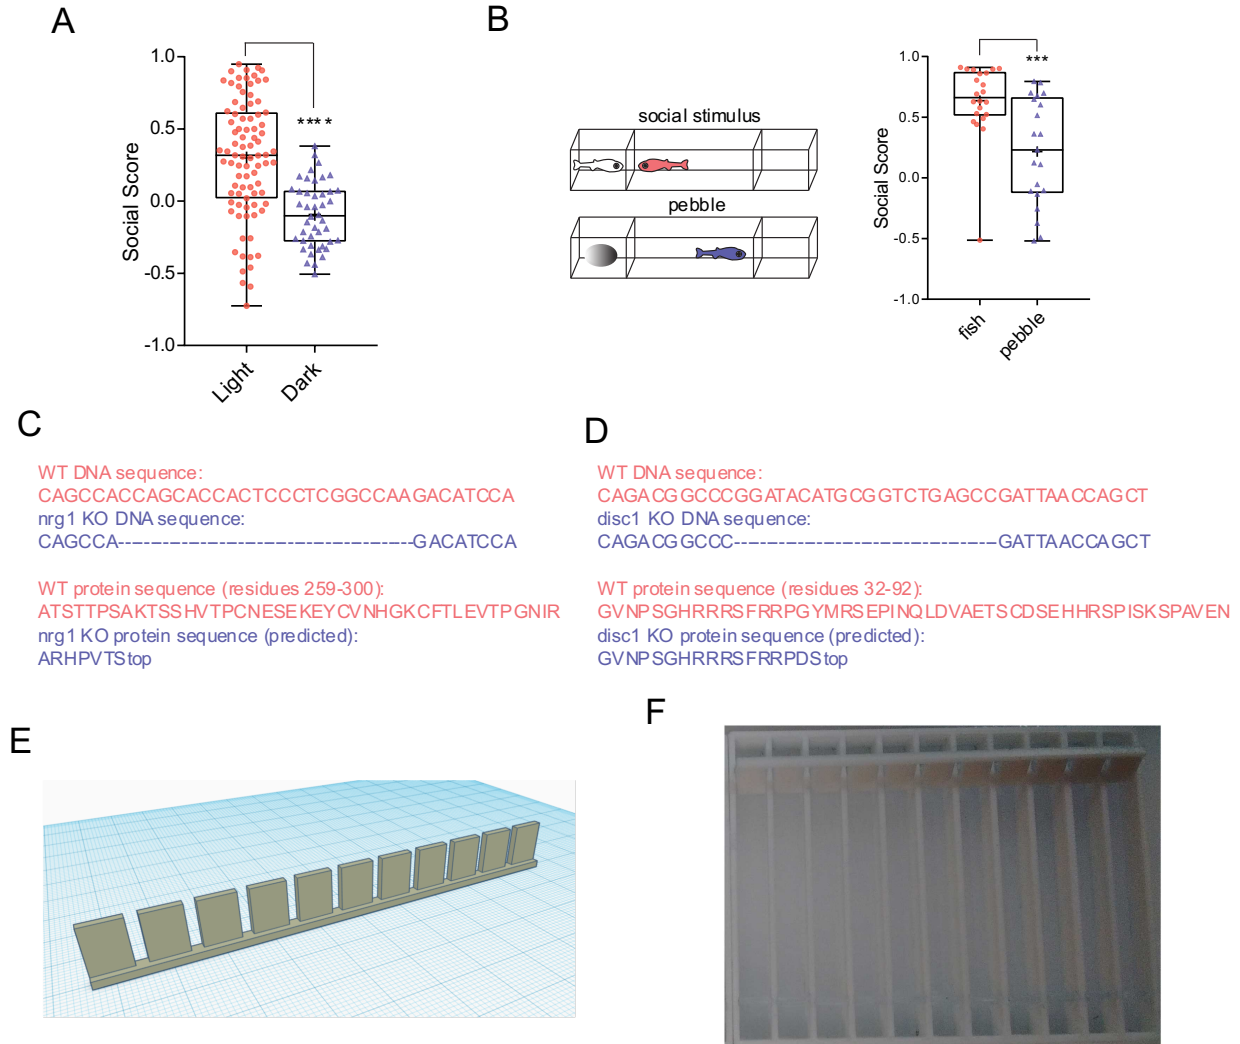

**Figure S1. Setting up the Fishbook assay.**

(A) Boxplot comparing social scores of WT fish in light (n = 87) or dark (n = 44). \*\*\*\*:  $p < 0.0001$ .

(B) Boxplot comparing social scores of WT fish in response to a social stimulus (fish; n = 22) or pebble (n = 21). \*\*\*:  $p < 0.001$ .

(C) DNA and protein sequences of WT and *nrg1* knockout fish.

(D) DNA and protein sequences of WT and *disc1* knockout fish.

(E) 3D printing design for the view-blocking comb.

(F) Image of a comb placed on a Fishbook test arena. The comb is not inserted in this image.

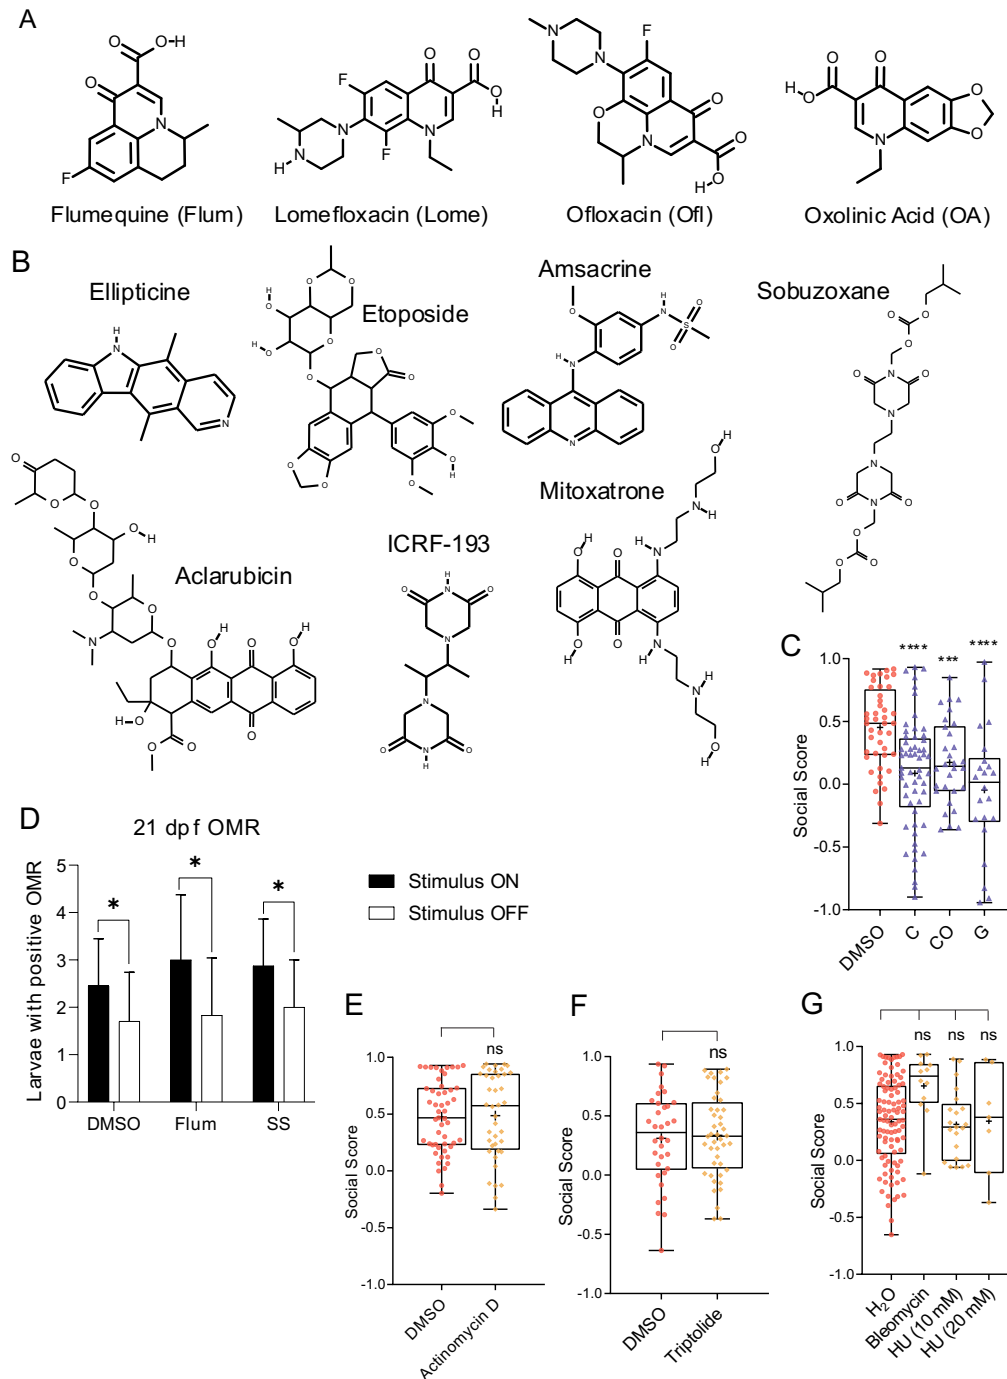

**Figure S2. Validations and mechanism studies for Top2 inhibitor-induced social deficits.**

(A) Chemical structures of fluoroquinolones.

(B) Chemical structures of eukaryotic Top2 inhibitors.

(C) Boxplot showing social scores of fish treated with DMSO (n=44), chlorpyrifos (C; 5  $\mu$ M; n=57), chlorpyrifos oxon (CO; 1  $\mu$ M; n=30), and genistein (G; 8  $\mu$ M; n=22).

(D) Optomotor response (OMR) assay found significant differences in the number of larvae showing positive OMR (moving toward the same direction of the stimulus) between periods with or without stimulus (Stimulus ON/OFF) in 21 dpf larvae that received embryonic treatment of DMSO (n=12), 15  $\mu$ M flumequine (Flum; n=6), and 100  $\mu$ M sodium salicylate (SS; n=8),

indicating that vision is unimpaired in Top2 inhibitor treated fish.

(E) Boxplot comparing social scores of fish treated with DMSO (n = 51) or actinomycin D (20  $\mu$ M; n = 40).

(F) Boxplot comparing social scores of fish treated with DMSO (n = 34) or triptolide (0.2  $\mu$ M; n = 44).

(G) Boxplot comparing social scores of fish treated with DMSO (n = 97), bleomycin (1  $\mu$ M; n = 12), or hydroxyurea (HU; 10 mM, n = 21; 20 mM, n = 7).

ns: not significant, \*\*\*:  $p < 0.001$ , \*\*\*\*:  $p < 0.0001$ .

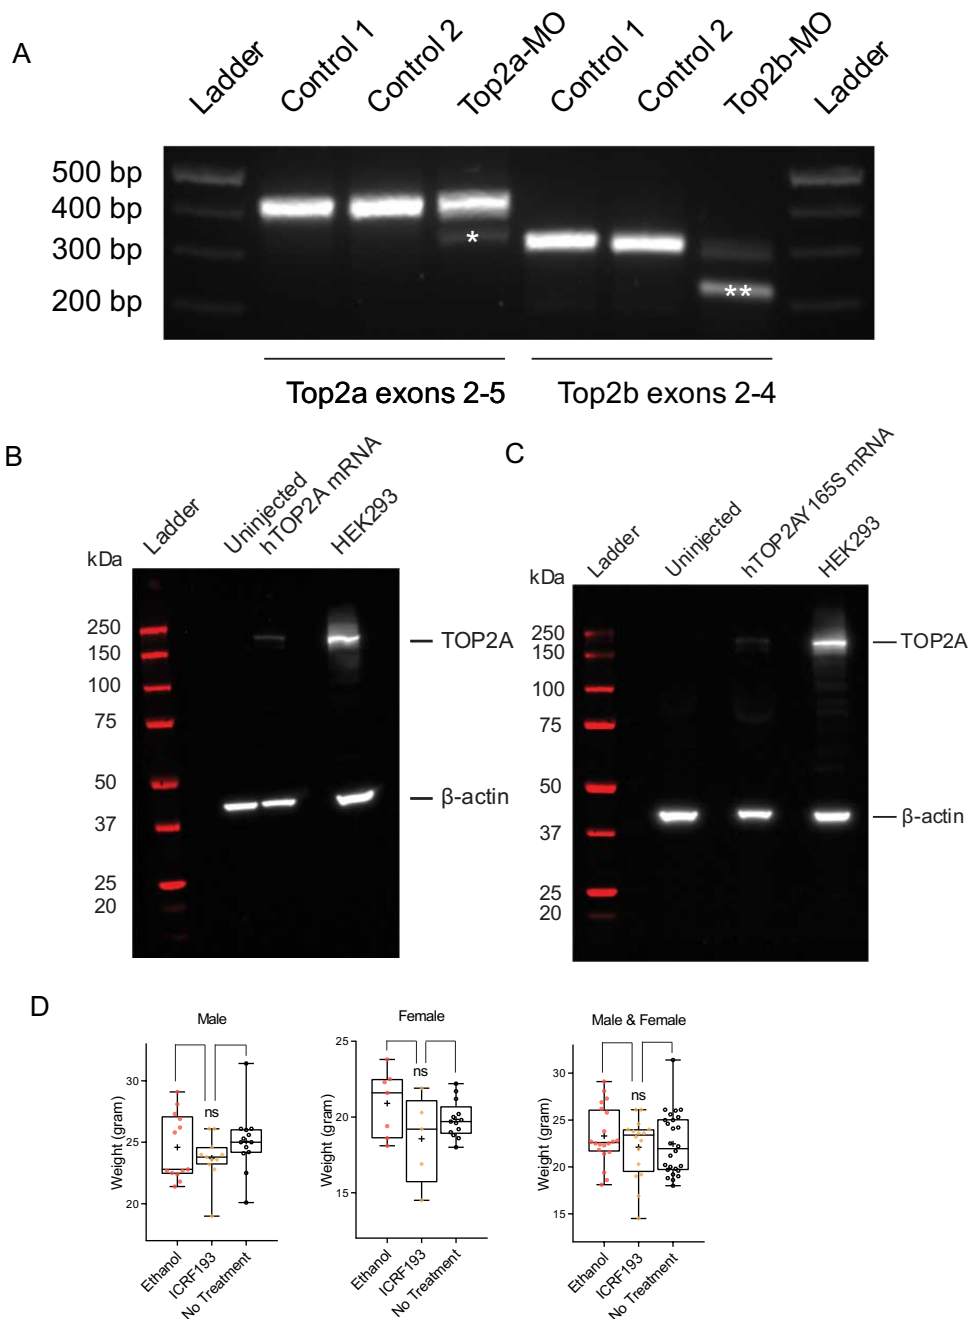

**Figure S3. Validation of Top2a/b morpholinos and TOP2A overexpression.**

(A) DNA gel image showing RT-PCR result of 1 dpf embryos injected with Top2a-MO (0.05 mM), Top2b-MO (0.05 mM), or un-injected (Controls 1 & 2).  $n = \sim 80 - 100$  embryos for each condition. \*: splice-blocked amplicon of Top2a. \*\*: splice-blocked amplicon of Top2b.

(B, C) Western blot images showing protein overexpression following injection of 250 ng/ $\mu$ l *hTOP2A* (B) and *hTOP2AY165S* (C) mRNAs in zebrafish embryos. HEK293 cell lysate was used as positive controls. Uninjected zebrafish embryos were used as negative controls.  $\beta$ -actin was used as a loading control.

(D) Boxplot comparing the body weights of mice treated with ethanol (male:  $n = 13$ , female:  $n = 7$ ), ICRF193 (male:  $n = 11$ , female:  $n = 5$ ), and no-treatment control (male:  $n = 13$ , female:  $n = 13$ ) at 2 months of age. ns: not significant.

A

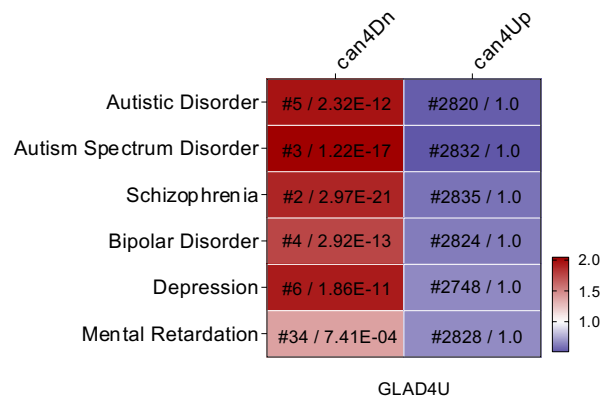

B

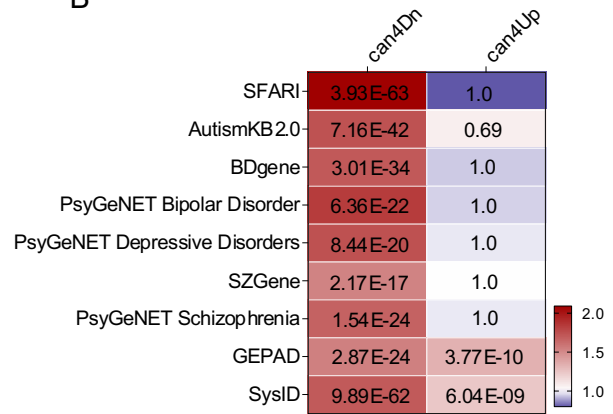

C

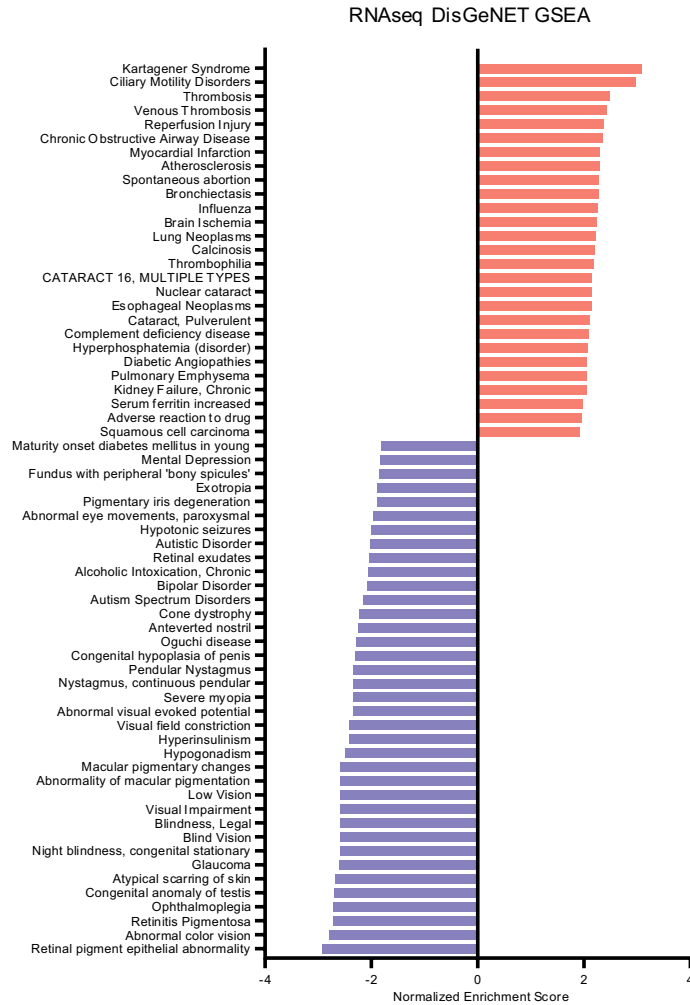

**Figure S4. Downregulated genes in the can4 mutant are enriched for autism genes and autism comorbidity risk genes – ORA and GSEA in DisGeNET library.**

(A) can4Dn but not can4Up is selectively enriched for autism and its comorbidities risk gene sets

from the GLAD4U library. For each cell, color represents odds ratio, and numbers represent ranking out of 3071 diseases in GLAD4U library (before slash) and adjusted  $p$ -value (after slash).

(B) Heatmap showing ORA analysis comparing can4Dn and can4Up using several independent disease risk gene sets related to autism and its comorbid disorders. Color in each cell represents odds ratio values. Number in each cell represents adjusted  $p$ -value.

(C) Bar chart showing normalized enrichment scores from GSEA analysis for RNA-seq data using the DisGeNET library.

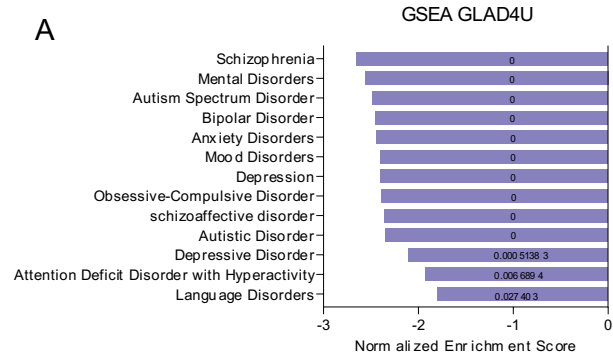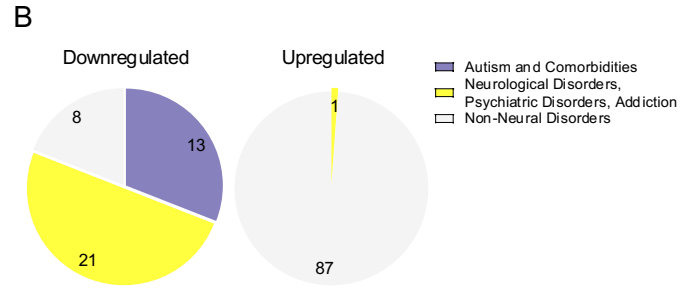

**C** RNAseq GLAD4U GSEA (negative)

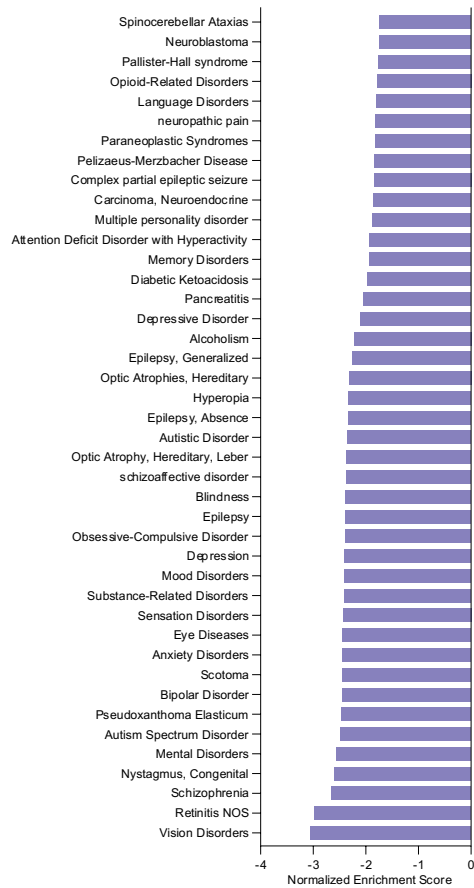

RNAseq GLAD4U GSEA (positive)

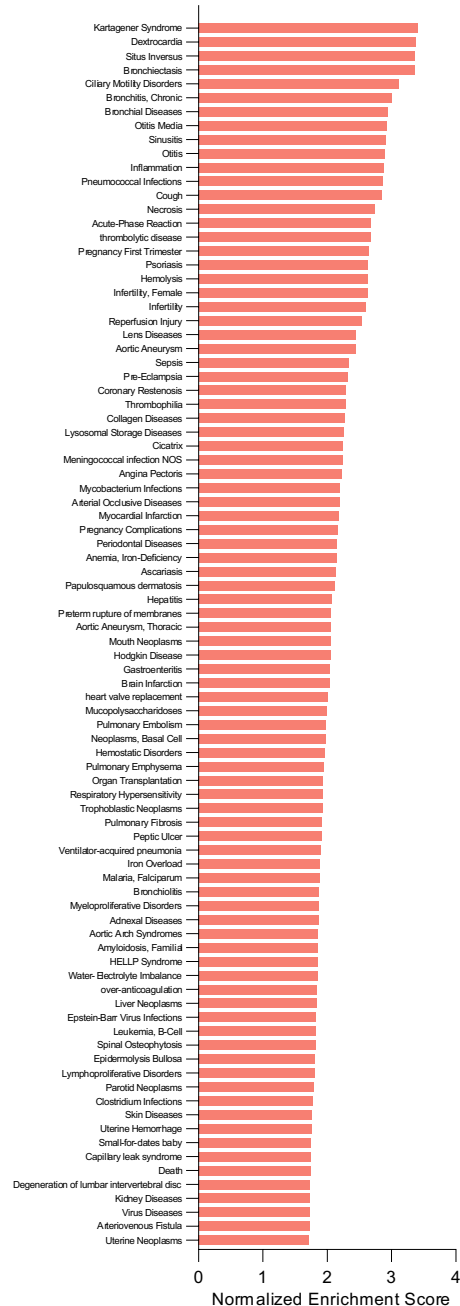

**D** RNA-seq GSEA:independent disease gene sets

Legend:   
■ FDR < 0.05   
■ FDR > 0.05

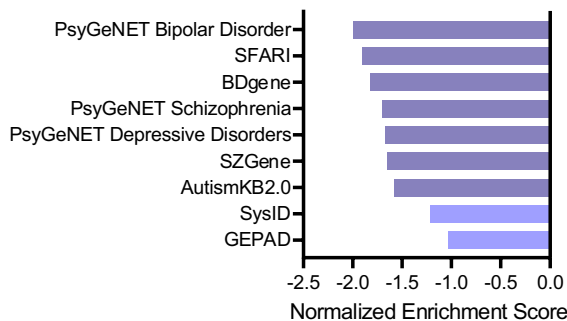



**Figure S5. Downregulated genes in the can4 mutant are enriched for autism genes and autism comorbidity risk genes – GSEA in GLAD4U library.**

(A, B) GSEA analysis of RNA-seq data using the GLAD4U library shows enrichment for autism and its comorbidities risk genes (A & B) and neurological conditions risk genes (B) in downregulated but not upregulated genes. Value inside each bar represents FDR (A).

Significance: FDR<5%.

(C) Bar charts showing normalized enrichment scores (NESs) from GSEA analysis for RNA-seq data using the GLAD4U library. Left: hits with positive NESs; right: hits with negative NESs.

(D) Bar chart showing normalized enrichment scores from GSEA analysis for RNA-seq data using several independent disease gene sets related to autism and its comorbid disorders.

Significance: FDR < 5%.

A

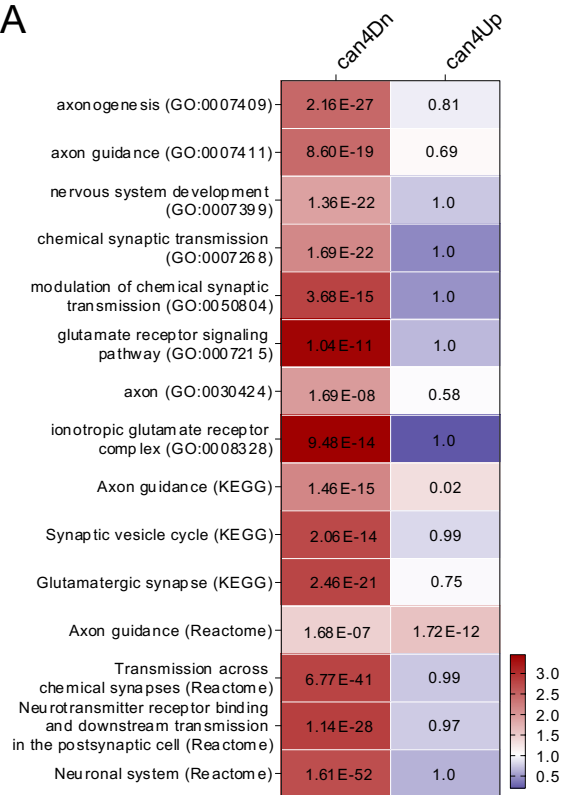

B

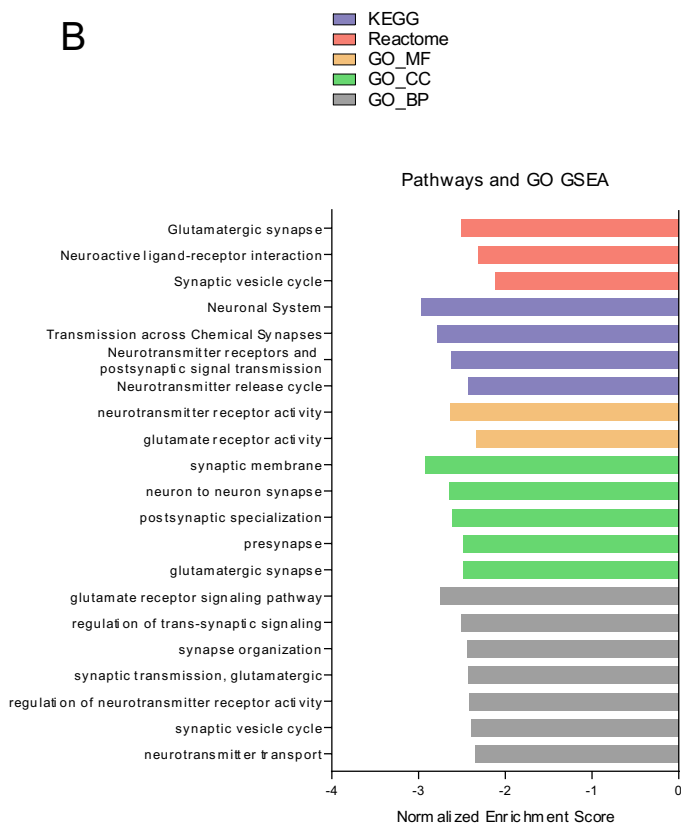

**Figure S6. can4Dn but not can4Up genes are enriched for autism related biological pathways.**

(A) Heatmap showing ORA analysis comparing can4Dn and can4Up using KEGG, REACTOME, and GO libraries. Color in each cell represents odds ratio.

(B) Bar chart showing GSEA analysis of KEGG, Reactome, and GO libraries using the RNA-seq data.

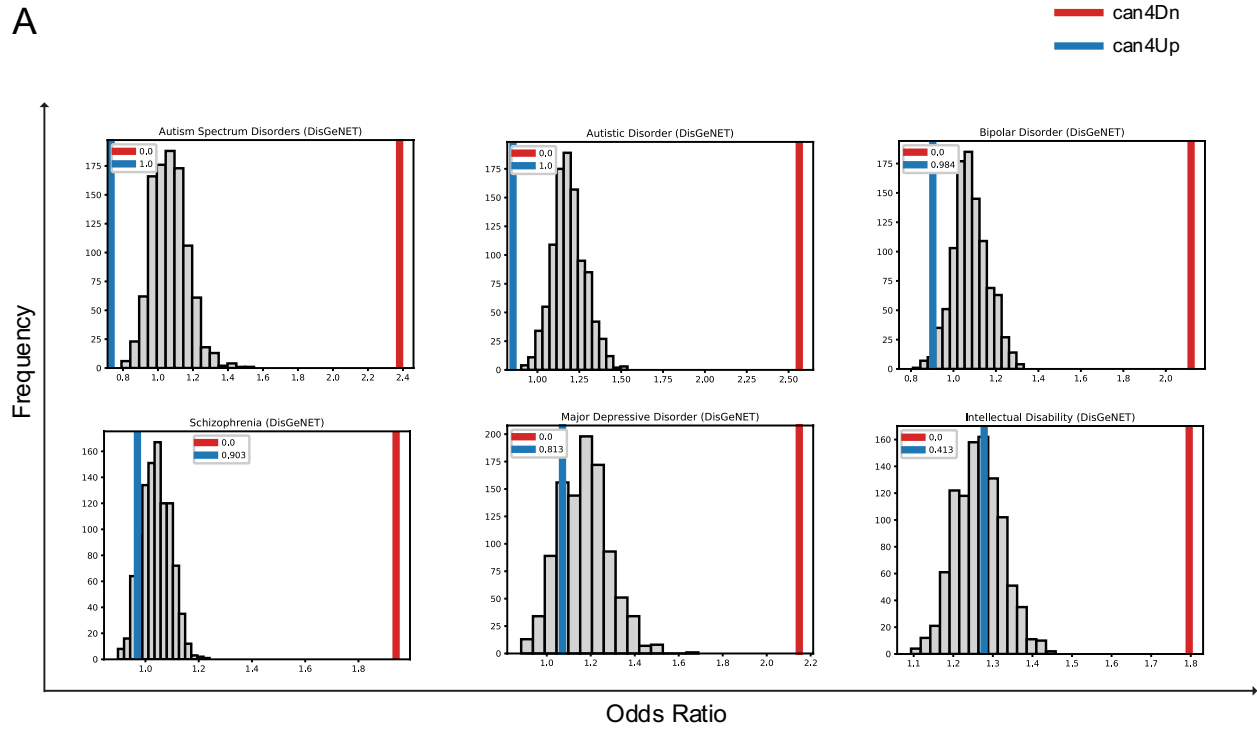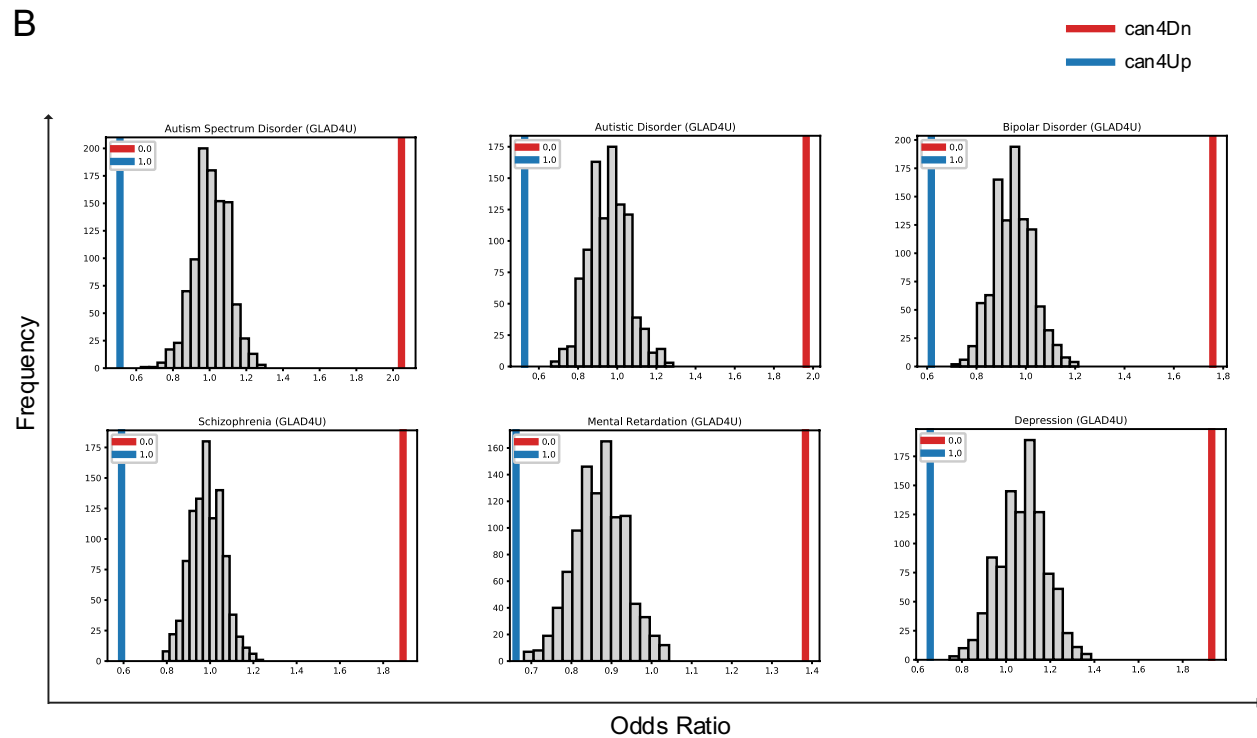

**Figure S7. can4Dn but not can4Up gives significantly higher odds ratios compared to the null distribution of randomly selected zebrafish genes – testing DisGeNET and GLAD4U libraries.**

(A) Histogram showing the null distribution of odds ratios generated by 1000 permutations by randomly selecting 5000 genes out of all human orthologs of zebrafish genes and conduct ORA

analysis using selected gene sets from the DisGeNET library. The odds ratios for can4Dn (red) and can4Up (blue) are marked by colored vertical lines, and their respective  $p$ -values are shown as numbers in legends. A  $p$ -value  $<0.008$  was considered significant to correct for multiple comparisons.

(B) Histogram showing the null distribution of odds ratios generated by 1000 permutations by randomly selecting 5000 genes out of all human orthologs of zebrafish genes and conduct ORA analysis using selected gene sets from the GLAD4U library. The odds ratios for can4Dn (red) and can4Up (blue) are marked by colored vertical lines, and their respective  $p$ -values are shown as numbers in legends. A  $p$ -value  $<0.008$  was considered significant to correct for multiple comparisons.

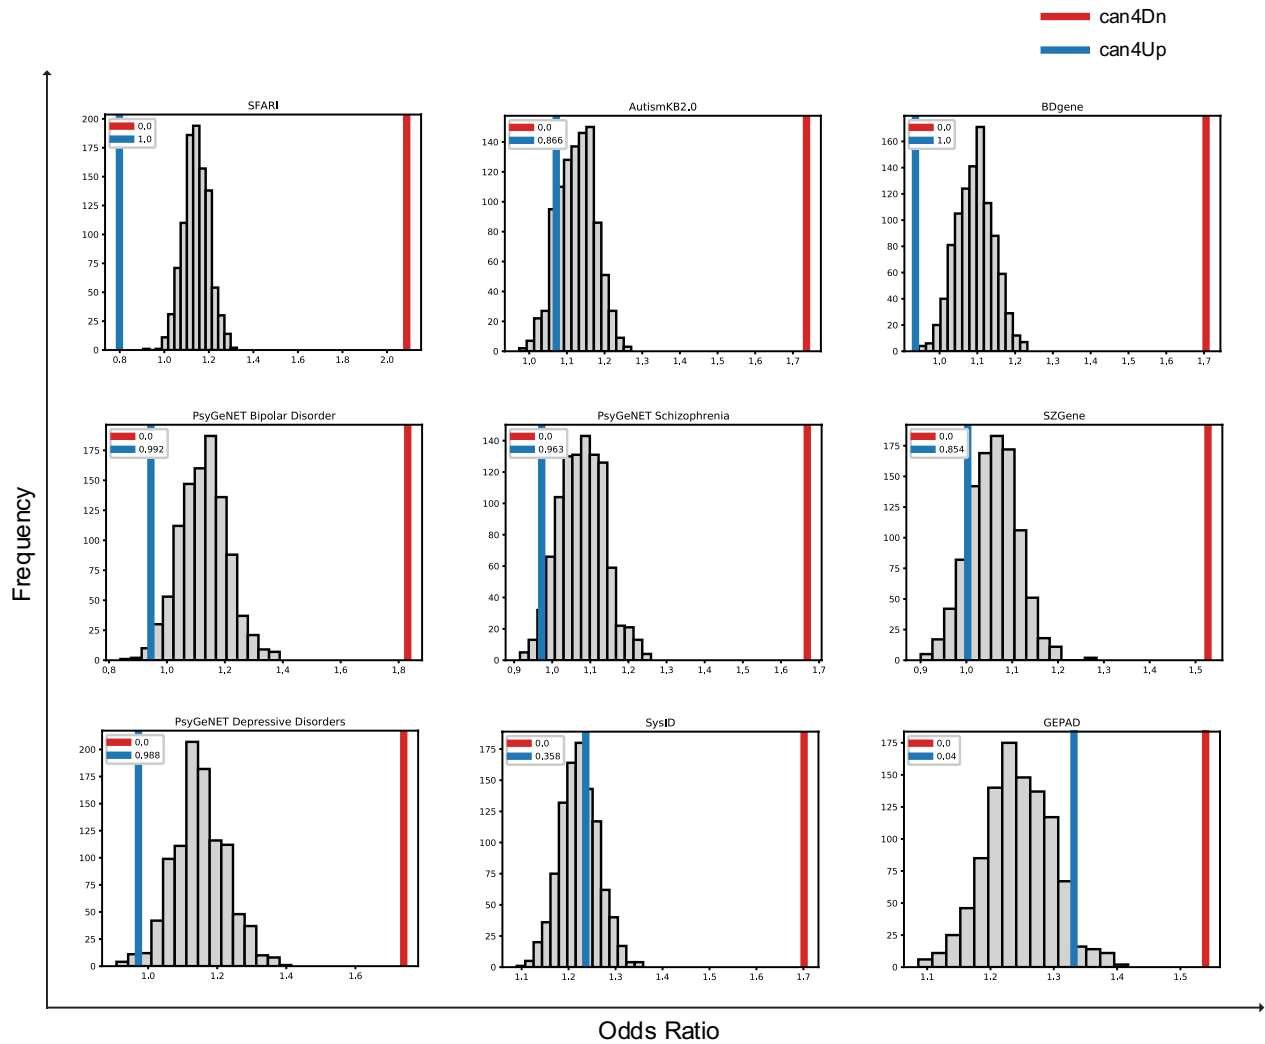

**Figure S8. can4Dn but not can4Up gives significantly higher odds ratios compared to the null distribution of randomly selected zebrafish genes – testing independent disease gene sets related to autism and its comorbid conditions.**

Histogram showing the null distribution of odds ratios generated by 1000 permutations by randomly selecting 5000 genes out of all human orthologs of zebrafish genes and conduct ORA analysis using selected gene sets from several independent disease gene sets related to autism and its comorbid conditions. The odds ratios for can4Dn (red) and can4Up (blue) are marked by colored vertical lines, and their respective  $p$ -values are shown as numbers in legends. A  $p$ -value  $< 0.005$  was considered significant to correct for multiple comparisons.

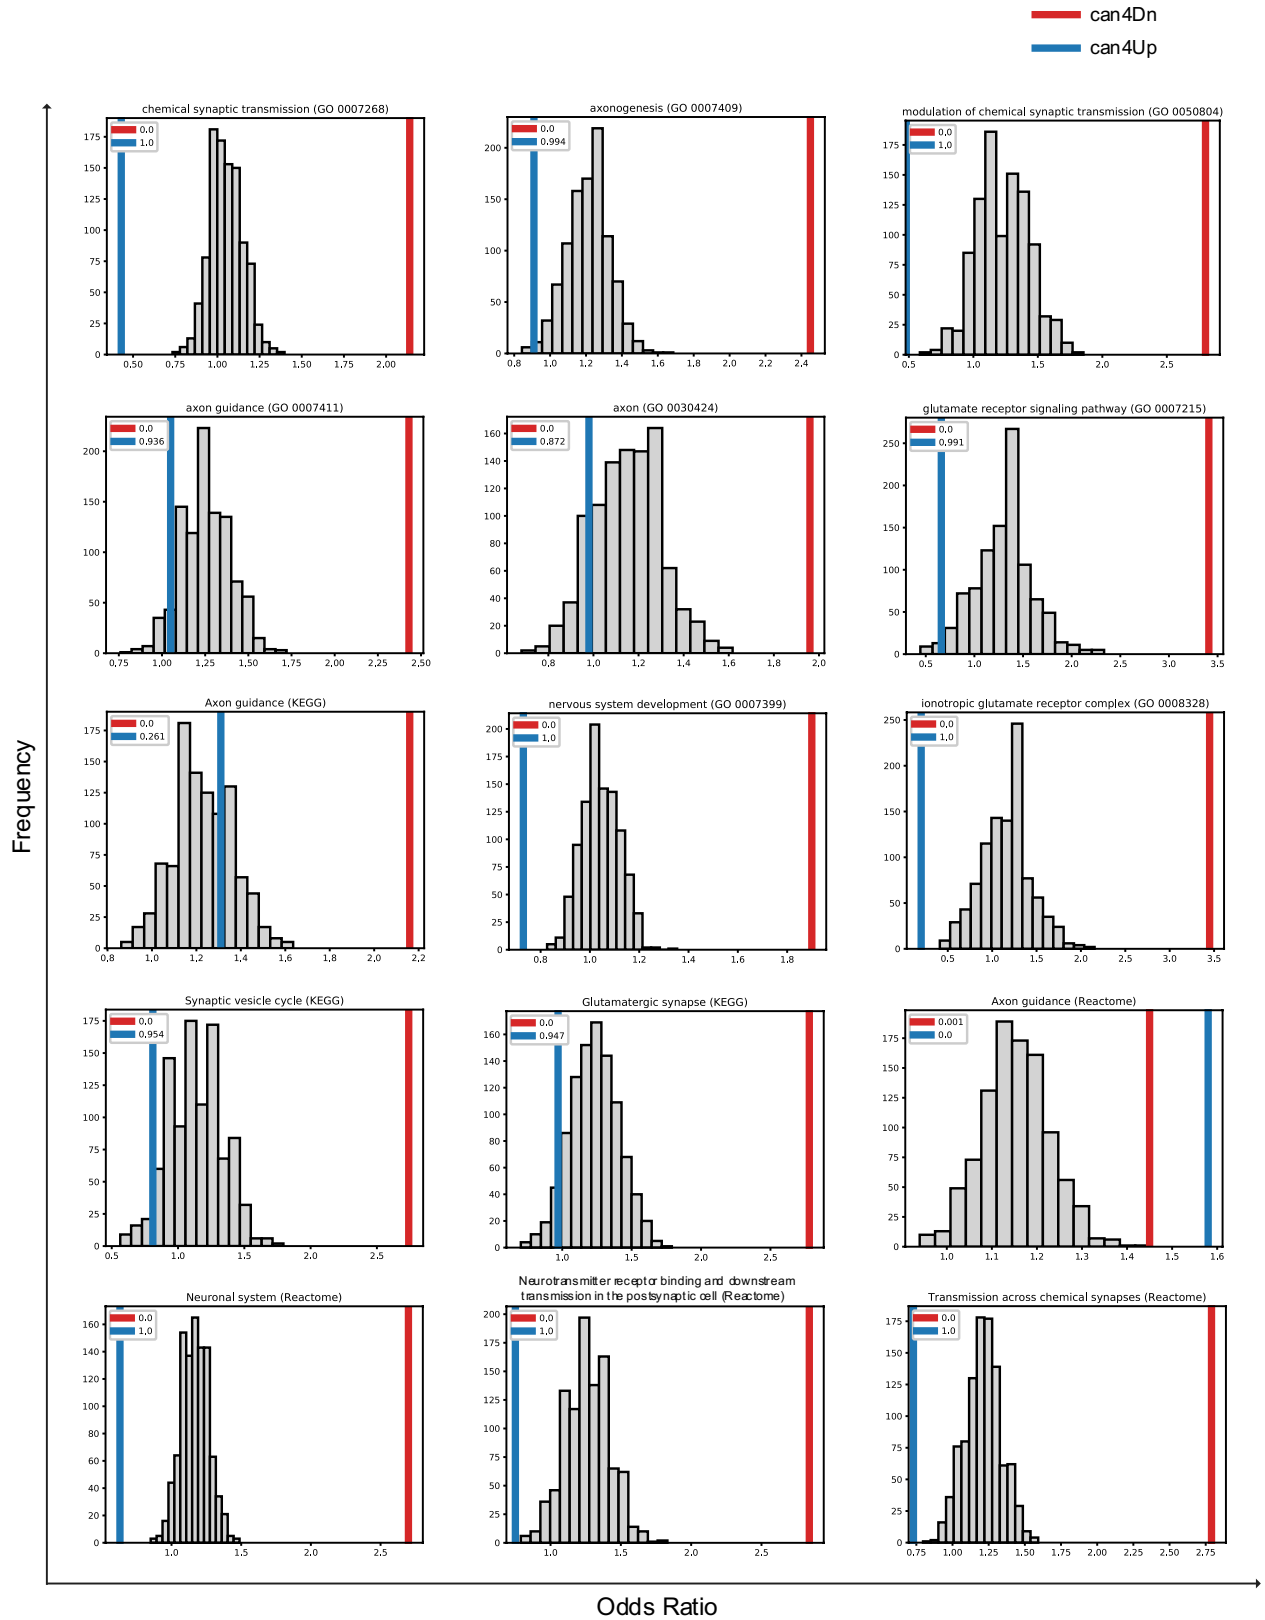

**Figure S9. can4Dn but not can4Up gives significantly higher odds ratios compared to the null distribution of randomly selected zebrafish genes – testing KEGG, Reactome, and GO**

**libraries.**

Histogram showing the null distribution of odds ratios generated by 1000 permutations by randomly selecting 5000 genes out of all human orthologs of zebrafish genes and conduct ORA analysis using selected gene sets from KEGG, Reactome, and GO libraries. The odds ratios for can4Dn (red) and can4Up (blue) are marked by colored vertical lines, and their respective  $p$ -values are shown as numbers in legends. A  $p$ -value  $<0.003$  was considered significant to correct for multiple comparisons.

Expected number of edges: 101  
 Actual number of edges: 393  
 Average node degree: 9.25  
 PPI enrichment p-value: < 1.0e-16

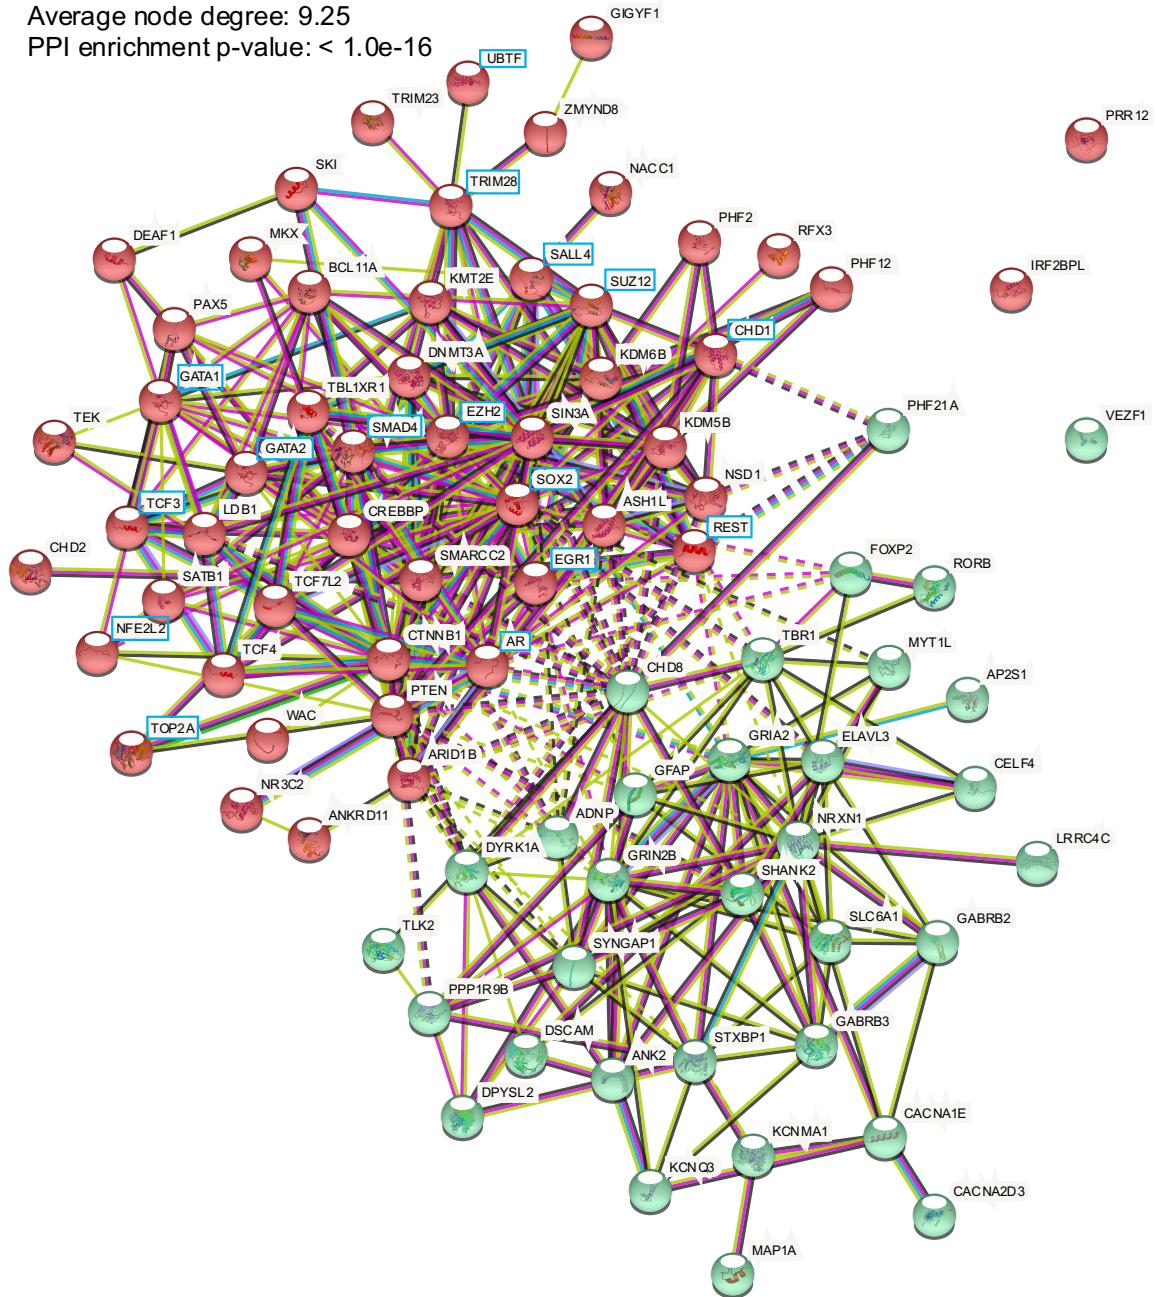

| Functional enrichments |                                                                                                  |                        |          |
|------------------------|--------------------------------------------------------------------------------------------------|------------------------|----------|
| GO-term                | Description                                                                                      | Strength of Enrichment | FDR      |
| GO:003509              | ESC/EZ complex                                                                                   | 1.84                   | 0.023    |
| GO:003243              | Histone demethylase activity                                                                     | 1.62                   | 0.004    |
| GO:000110              | RNA polymerase II activating transcription factor binding                                        | 1.55                   | 4.78E-05 |
| GO:009710              | Postsynaptic density assembly                                                                    | 2.3                    | 0.012    |
| GO:190435              | Transmitter-gated ion channel activity involved in regulation of postsynaptic membrane potential | 1.65                   | 0.006    |

**Figure S10. The 15 common upstream regulators of SFARI and can4Dn genes are functionally integrated with 70 Satterstrom-can4Dn genes at the protein level. Protein-protein interaction (PPI) network of Top2a, the 15 common upstream regulators of**



SFARI and can4Dn genes, and 70 Satterstrom-can4Dn genes. The network is divided into two clusters by kmeans clustering, as shown by the nodes colored red and green. The blue rectangles label Top2a and the 15 common upstream regulators of SFARI and can4Dn genes: all these factors are assigned to the red cluster. Table shows the functional enrichments of the two clusters, with the red cluster enriched in genes associated with chromatin modification and transcriptional regulation while the green cluster is enriched in genes associated with synaptic activity regulation.

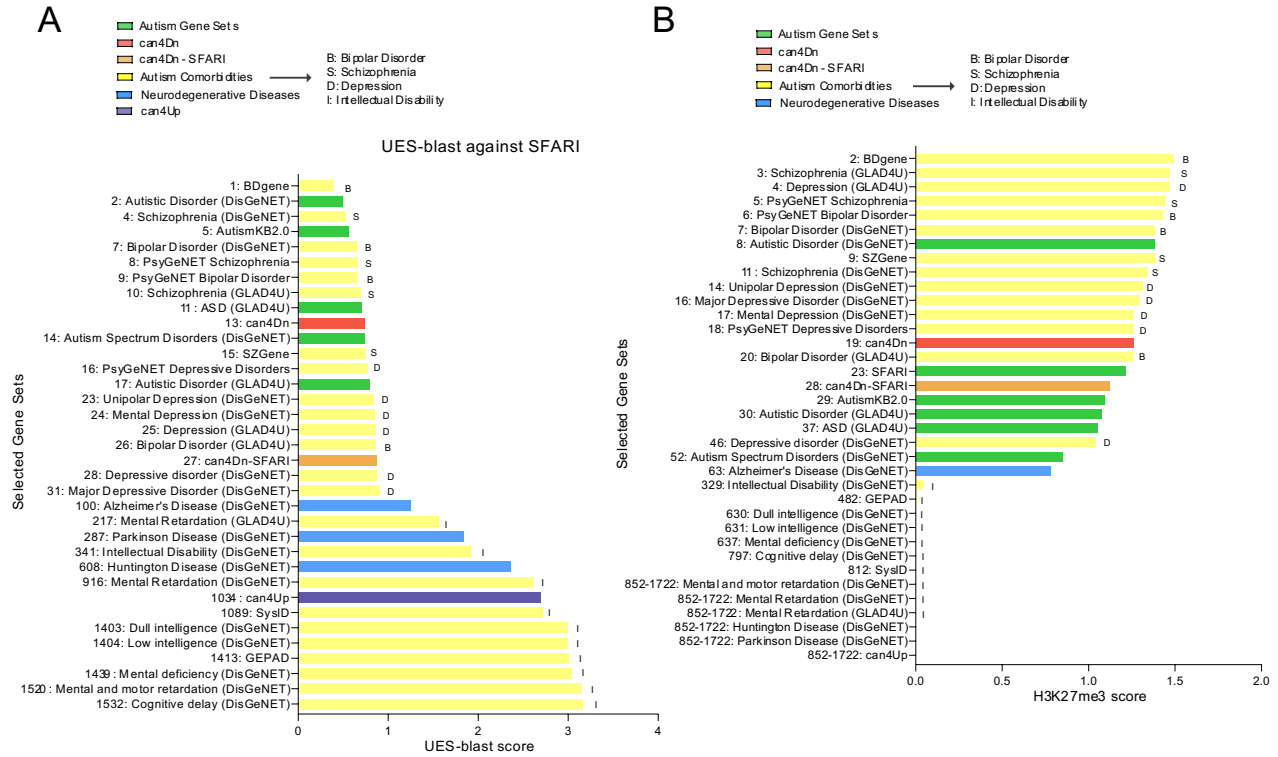

**Figure S11. Detailed looks at UES-blast and H3K27me3 score rankings.**

(A) A detailed look at UES-blast rankings of the key gene sets in Figure 6C. Bar chart shows the UES-blast scores of autism risk gene sets (green), can4Dn (red), can4Dn-SFARI (orange), autism comorbid conditions risk gene sets (yellow; D: depression, B: dipolar disorder, S: schizophrenia, I: intellectual disability), can4Up (dark blue), and neurodegenerative disorders risk gene sets (blue). Numbers in the x-axis labels before gene set names represent the UES-blast rankings of each labeled gene set.

(B) A detailed look at H3K27me3 score rankings of the key gene sets in Figure 6F. Bar chart shows the H3K27me3 scores of autism risk gene sets (green), can4Dn (red), can4Dn -SFARI (orange), autism comorbid conditions risk gene sets (yellow; D: depression, B: dipolar disorder, S: schizophrenia, I: intellectual disability), can4Up (dark blue), and neurodegenerative disorders risk gene sets (blue). Numbers in the x-axis labels before gene set names represent the H3K27me3 score rankings of each labeled gene set.

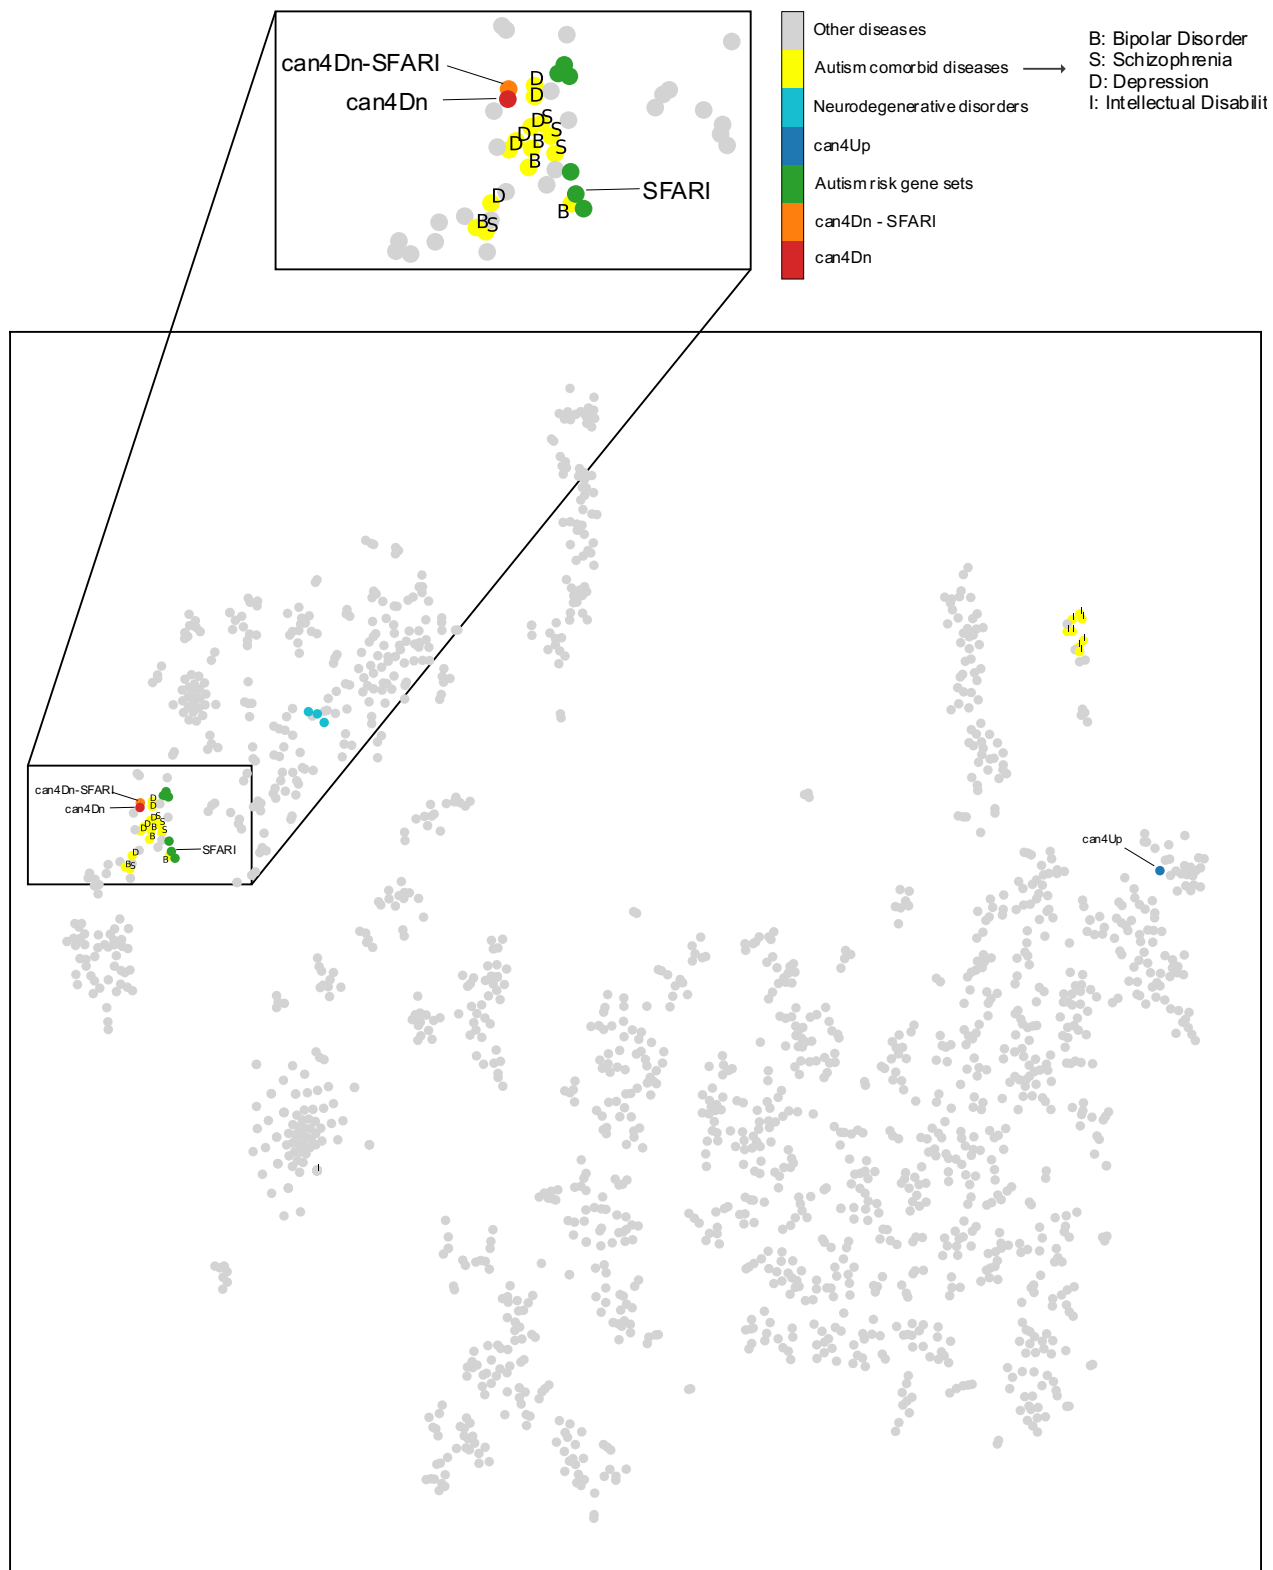

**Figure S12. The upstream enrichment signatures (UESs) of can4Dn, SFARI, and other autism risk gene sets tightly cluster together compared to the reference dataset.**  
 tSNE clustering of can4Dn, can4Dn-SFARI, autism risk gene sets, neurodegenerative disorders risk gene sets, and all control gene sets from the reference dataset. Letters label autism

comorbidities risk gene sets, I: intellectual disability; D: depression; S: schizophrenia; B: bipolar disorder.

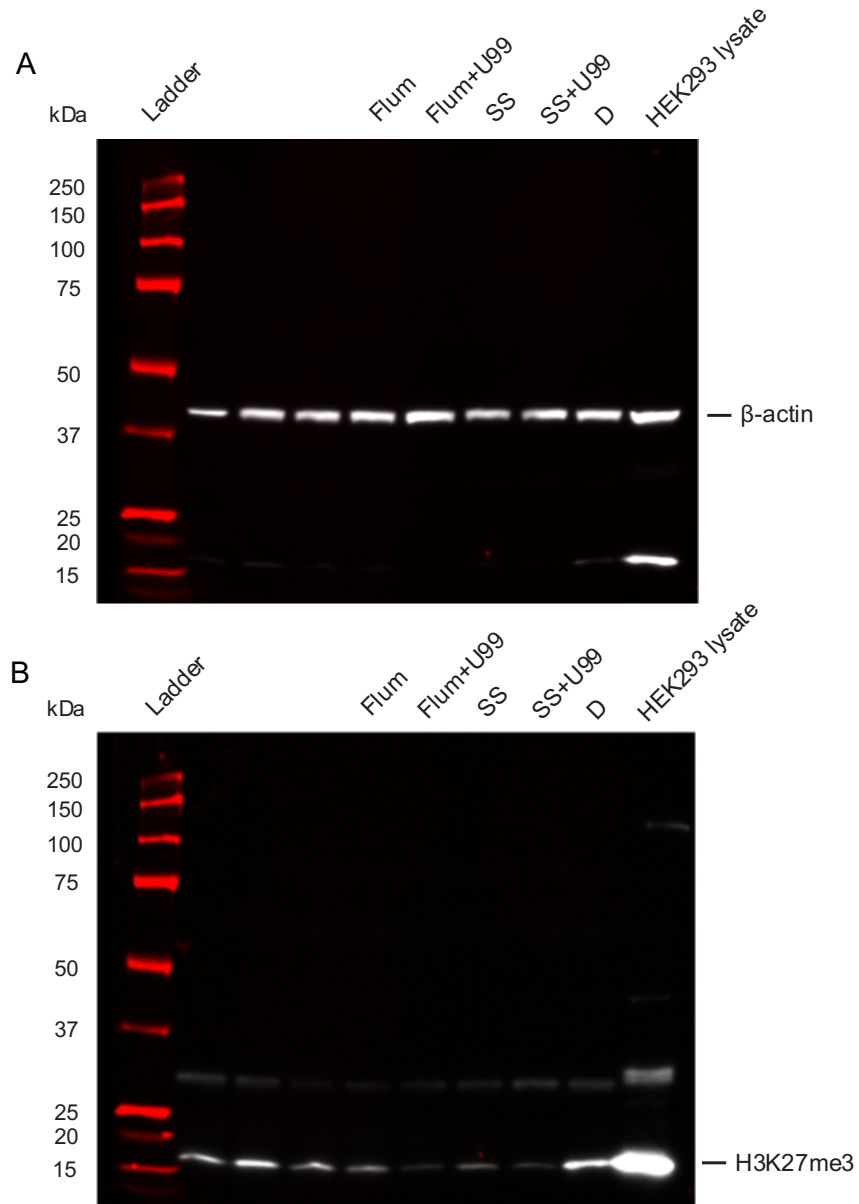

**Figure S13. The raw Western blot images corresponding to data in Figures 8C.**  
 Raw Western blot images of  $\beta$ -actin (A) and H3K27me3 (B) blotting. Cropped images are shown in Figure 8C.

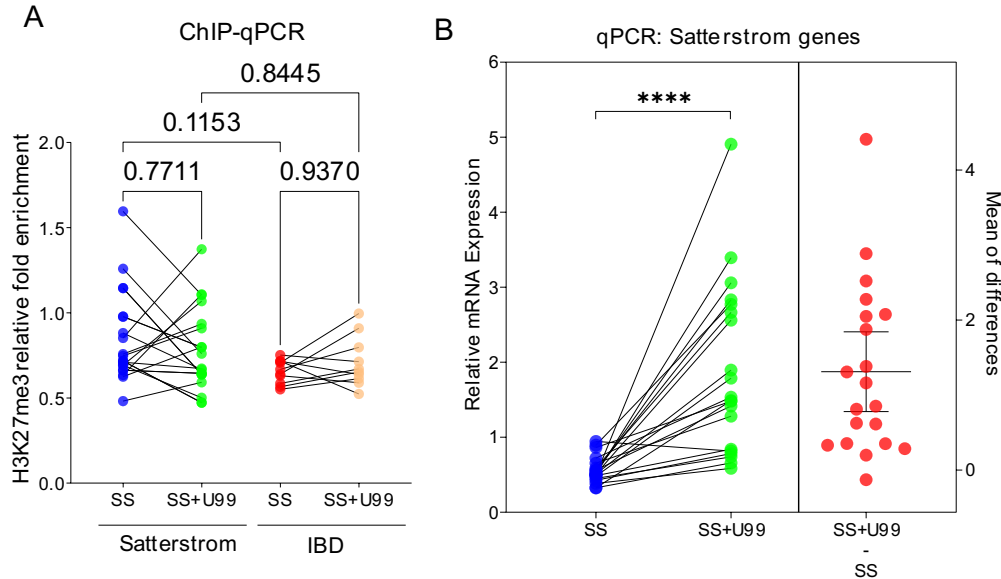

**Figure S14. UNC1999 rescues changes in H3K27me3 and gene expression induced by Top2a inhibition.**

(A) ChIP-qPCR shows differences in the relative fold enrichment of H3K27me3 (compared to the H3K27me3 level in the promoter region of *eef1a1a* gene) in zebrafish orthologs of 13 top ranking Satterstrom genes (Satterstrom) versus IBD risk genes (IBD) in 3 dpf larvae treated with 100  $\mu$ M sodium salicylate (SS). The promoter regions of Satterstrom genes (blue) have a higher relative level of H3K27me3 compared to the IBD genes (red). Co-treatment of 10  $\mu$ M UNC1999 (U99) reduced the relative level of H3K27me3 in the Satterstrom genes (green) and increased that in the IBD genes (brown), therefore rebalancing the level of H3K27me3 between Satterstrom and IBD genes. Each dot represents the relative fold enrichment of H3K27me3 for a single gene. Numbers indicate adjusted  $p$ -values using ordinary one-way ANOVA and Tukey's multiple comparisons test.

(B) qPCR shows downregulation of the zebrafish orthologs of the 13 top ranking Satterstrom genes in brain samples collected from adult zebrafish that received embryonic treatment of 100  $\mu$ M sodium salicylate (SS; using the same data shown in Figure 5E) compared to DMSO control. Co-treatment of 10  $\mu$ M UNC1999 (U99) at the embryonic stage rescued gene expression. Differences in relative mRNA expression levels between these two samples (SS+U99 - SS) are shown as red dots, with the horizontal bars representing mean and standard deviation of the differences. Significance is calculated using paired  $t$  test. \*\*\*\*:  $p < 0.0001$ .

**Table S1. qPCR primers for Satterstrom genes.**

| <b>Human Gene</b> | <b>Zebrafish Ortholog</b> | <b>Forward Primer</b>  | <b>Reverse Primer</b>     |
|-------------------|---------------------------|------------------------|---------------------------|
| ADNP              | adnpa                     | GGGAATTCCATGCGAGACCG   | ACCGGGTGAGGTTATTCACCTGG   |
|                   | adnpb                     | TCTTTCCCGGCAGACAGGCA   | TGCTGAGGTTGTTCACTGGGA     |
| ARID1B            | arid1b                    | ACGCCTCTCATCAGAGCAGAC  | TAGGCTTCACTCTCGTGCCG      |
| CHD8              | chd8                      | CCTCGGTTACTCACGGGTGG   | ACTCCCTTCACCGTTTGGCA      |
| DYRK1A            | dyrk1aa                   | GATCGAAGTGC GACTGCTGG  | TTACGCGTCAGGTTCAAGGA      |
|                   | dyrk1ab                   | ACGCTGTTGTACCTGTCA GC  | CGAGGGTTTGCATGCTGAGG      |
| FOXP1             | foxp1a                    | CATTGCCGTCAGTCACAA CCC | GGGACTTCTCACC ACTTGCT     |
| FOXP2             | foxp1b                    | TAGTGACAGCAGCCCTGGAC   | GGGAGAAACCAGGCTTACAGCA    |
| GRIN2B            | grin2bb                   | GACTTCTCCCCTCCGTTCCG   | TCAGGACCGCTGCATCGTAG      |
| KMT5B             | kmt5b                     | AGGCTTGAGCCAGAAGGAA    | TCAACAAGACGGCGACAGGT      |
| POGZ              | pogza                     | CTGCAATGTCACGTCGAGGC   | CCAGGCTTGTGCACGTGTTT      |
|                   | pogzb                     | ATCATGTTCTGGAAGGGCTCC  | GGCAGAACTCAATATCTGTC TCCA |
| PTEN              | ptena                     | CCCAGGGCTTCAAGAAAGGCA  | GTGTGGGCTGGATTTGACGTG     |
|                   | ptenb                     | AGACGGGTTCTGACTTGGA CT | ACACCCTCCAGTCTTTCAGCA     |
| SHANK3            | shank3a                   | TCCGGTTGTGCTTTTTGCGA   | GCTTATCCATCACCGCCAGC      |
|                   | shank3b                   | TTCACAGACCAGAGAAGGACC  | GGCAGGTGGACTGATAGGCA      |
| SLC6A1            | slc6a1a                   | GCAGTTGCCCGTTTCACCAC   | CCAGAGCAGTGATGAAGCCCT     |
|                   | slc6a1b                   | GCATCTGGAAGGGCGTAGGA   | TTGCTGAACTCAGGCGTCAC      |
| SYNGAP1           | syngap1a                  | TCCGTGCGCTGTACGAGTCT   | CCTTCAGCTCACGGGGAAAC      |
|                   | syngap1b                  | GGGCCTTCGAGGGCTACATT   | GGCATCCTTTGACACAATAA ACCA |

**Table S2. ChIP-qPCR primers for Satterstrom genes.**

| <b>Human Gene</b> | <b>Zebrafish Ortholog</b> | <b>Forward Primer</b>       | <b>Reverse Primer</b>        |
|-------------------|---------------------------|-----------------------------|------------------------------|
| ADNP              | adnpa                     | CCGGTGGATTTCCGGCAACT<br>C   | CCCGTCTAAACCGCGCAA<br>T      |
|                   | adnpb                     | GGAAAACAGTATGCCACAT<br>CCCA | TCCTGACTGTGAGGGAGGA<br>GA    |
| ARID1B            | arid1b                    | AAGTCTCCGCTCGCCTCAG<br>A    | TTGAGGATGGAGCGTTCGC<br>C     |
| CHD8              | chd8                      | CCCTCTGCCAACCGACCAA<br>T    | ACAGGAAACGGCCAGCGTA<br>G     |
| DYRK1<br>A        | dyrk1aa                   | ACATCTGCAGAGACTCGGA<br>GC   | GTTCAGTGACCTCAGCGTGC         |
|                   | dyrk1ab                   | CATCCGGGTACTAGGCTGC<br>T    | TTATTCCGGCGGGAAGCGA<br>A     |
| FOXP1             | foxp1a                    | AGCGTACACATGACGGTTC<br>G    | TCAGCTCTCCAGGACCACT          |
| FOXP2             | foxp1b                    | AGATGCGTTACTGGCCCTG<br>G    | AGGAGATCTCACCGCGACA<br>C     |
| GRIN2B            | grin2bb                   | GCAGTAATCCTGCAGAGGG<br>ACC  | GGACAGAGCGCTGTGGAGT<br>A     |
| KMT5B             | kmt5b                     | TAGCGCTCGATCACCATCC<br>A    | AGACGACAGGACAACCGAG<br>C     |
| POGZ              | pogza                     | TACCAGCGCGAGCAAAGA<br>GG    | GCTTTAACTCTTCGCGGGCT<br>T    |
|                   | pogzb                     | CCGGCAGGCTTTGTGTTCT<br>TT   | CTGTCCTCCGCGCACATAAC         |
| PTEN              | ptena                     | GAGGAGAGATGAGTCCCG<br>CC    | TGCGTGTTAGATGTGCGAC<br>G     |
|                   | ptenb                     | TGCGCTCGCAGTAACCCTA<br>A    | TTGTTGAGCTGACATGGCGT         |
| SHANK<br>3        | shank3a                   | AAGACCACTGAAGGGGCG<br>ATTA  | CTGCTTATTTTACTGTGCTC<br>TGCT |
|                   | shank3b                   | AGCATCAGGGTTGGGCTTC<br>A    | TCGCAGGCACTTTTCAGAGC         |
| SLC6A1            | slc6a1a                   | AGACAGTCGTTGCTCGGTG<br>G    | CCATGTAAAGCGGTCCTGC<br>G     |
|                   | slc6a1b                   | ACTGGACGCGGATTCTAGA<br>CG   | AAAGTGCGGTGGTGCTGAA<br>G     |
| SYNGA<br>P1       | syngap1a                  | CGATCAGCTTACTCATTGG<br>CCG  | CGCCGATCACTTTACGCTCA         |
|                   | syngap1b                  | GTGATGCGATACACGGGCT<br>C    | CGCTGGAGCGATATTCCCGT         |



**Table S3. ChIP-qPCR primers for IBD genes.**

| <b>Human Gene</b> | <b>Zebrafish Ortholog</b> | <b>Forward Primer</b>       | <b>Reverse Primer</b>         |
|-------------------|---------------------------|-----------------------------|-------------------------------|
| PTGS2             | ptgs2a                    | TTGCGCAAGACCTCCTCC<br>TC    | GTTACTCTGGTCGAGCCCGTT         |
|                   | ptgs2b                    | CTGAGCAGGTAGCCTACGC<br>C    | TGAGGAGCCGATGACGCAAT          |
| LY75              | ly75                      | GGCGAGGCAACATCGGTTA<br>AG   | CATACGCGTTCACAGGCCG           |
| PLA2R<br>1        | pla2r1                    | CGCGACGCAACGGGAATC          | CCGTCTGTTCTGACCGCGAC          |
| NFKBI<br>Z        | nfkbiz                    | TGGTCTGAGAGCAGAAGTC<br>GCC  | ACACACGTCATTACGTCCAG<br>GT    |
| OSMR              | osmr                      | TGCTCTGTAGATGGAGCTC<br>TGC  | GCGGTCCAGAAATCACTGGG<br>T     |
| PTK2B             | ptk2ba                    | TCACACTTCAGGTCTGTCA<br>AGC  | GCACTTCCTTCTCAGTGTTTG<br>AGTG |
|                   | ptk2bb                    | ACCACTACCACCACTGTTT<br>ACCC | ACAGTGTCTCCTAAAGCAAG<br>CAT   |
| SH2B3             | sh2b3                     | TGTTTGGCTTGCTGAGCTTA<br>TG  | AAGGTGGACTCTATGGGTGC<br>TG    |
| NFATC<br>1        | nfatc1                    | TCTGCTGTTGCGCTTGAGA<br>C    | AAAGCCGGGAAACACCTCCG          |

**Table S4.**

A list of all genes included in the BDgene gene set.

**Movies S1.**

Video recording of a Fishbook test. Played at 4× the actual speed.

**Data S1.**

The can4Dn and can4Up gene lists.
